# Supplementary material
Source: Elsevier journal article supplement (https://www.sciencedirect.com/science/article/pii/S2173573519300845)
Supplement: mmc1 [file S2173573519300845:mmc1.pdf]

## APÉNDICE: RESUMEN DE RECOMENDACIONES

### RECOMENDACIONES PREOPERATORIAS

No se recomienda la administración profiláctica de calcio y vitamina D excepto en los casos con evidencia de déficit preoperatorio.

Se recomienda la realización de la intervención por un equipo quirúrgico experimentado.

Se recomienda vigilancia más estrecha en los pacientes con enfermedad de Graves, en especial si tienen cifras elevadas de fosfatasa alcalina que indiquen riesgo de fenómeno de hueso hambriento postoperatorio.

Se aconseja programar una vigilancia postoperatoria más estrecha en los casos de mayor complejidad quirúrgica, en particular en reintervenciones, bocios voluminosos con extensión intratorácica y disecciones del compartimento central.

### RECOMENDACIONES INTRAOPERATORIAS

Se recomienda la búsqueda e identificación de todas las glándulas paratiroides durante la cirugía.

Se recomienda la identificación y preservación cuidadosa del pedículo vascular.

Se recomienda la valoración del estado de las glándulas paratiroides al finalizar la cirugía, así como el registro detallado de los hallazgos.

Si no se han identificado todas las paratiroides, se recomienda la revisión de la pieza quirúrgica en el campo y el reimplante de las glándulas extirpadas inadvertidamente.

Cuando se realiza una tiroidectomía, se recomienda el reimplante glandular sólo en caso de lesión objetiva o duda de la funcionalidad final de la glándula.

En el caso de vaciamiento ganglionar central bilateral tras tiroidectomía, se recomienda la exéresis y reimplante de, al menos, una glándula paratiroides.

### RECOMENDACIONES PARA EL POSTOPERATORIO INMEDIATO

No se recomienda el empleo postoperatorio rutinario de suplementos de calcio y/o vitamina D en todos los pacientes intervenidos de tiroidectomía total

La tetania franca o la hipocalcemia grave debiera tratarse con calcio intravenoso. La hipocalcemia moderada puede tratarse con preparados de calcio por vía oral y calcitriol. La hipocalcemia leve o la tetania latente puede tratarse con suplementos de calcio oral.

Se recomienda el empleo de PTH para determinar en las primeras horas de postoperatorio el riesgo de desarrollar hipocalcemia clínica. Se aconseja comparar los valores postoperatorios con los preoperatorios, y extraer la muestra en un momento que permita su procesamiento en condiciones óptimas.

Como valor orientativo, aquellos pacientes en los que la variación pre-postoperatoria de PTH sea menor del 80% tienen un riesgo muy bajo de hipocalcemia clínica y pueden ser dados de alta sin suplementos, aunque se recomienda ajustar este umbral según las características de cada centro y cada caso concreto, así como instruir a los pacientes sobre la conducta a adoptar en caso de síntomas de hipocalcemia.

Se debe considerar iniciar tratamiento con suplementos de calcio, con o sin calcitriol, en los pacientes con riesgo de hipocalcemia clínica elevado o indeterminado (descenso de PTH > 80% respecto al valor preoperatorio).

Los pacientes en los que se determine un riesgo muy alto de hipocalcemia sintomática (en general, con una PTH postoperatoria indetectable) deberían iniciar suplementos de calcio oral y calcitriol en las primeras 24 h de postoperatorio.

En los casos en los que se inicie tratamiento con suplementos de calcio con o sin calcitriol, los pacientes deben ser vigilados, y se debe monitorizar la clínica y la calcemia para ajustar las dosis. Se recomienda que esta monitorización se realice en régimen de hospitalización hasta la estabilización de la calcemia, aunque podría realizarse en régimen ambulatorio bajo las condiciones de seguridad adecuadas.

Conseguida una calcemia estable, debe mantenerse esa dosis durante 1-3 semanas antes de comenzar a descenderla paulatinamente

## RECOMENDACIONES PARA EL TRATAMIENTO CRÓNICO

Se recomienda tratar a los pacientes con hipoparatiroidismo **permanente** con sales de calcio oral y calcitriol para mantenerles libres de síntomas y con una calcemia en el límite bajo de la normalidad o ligeramente por debajo de este.

En caso de hipercalcemia se aconseja reducir la ingesta de calcio y restringir la ingesta de sal en la dieta. Puede ser necesario añadir un diurético tipo tiazida al tratamiento.

En pacientes con hiperfosfatemia y/o producto calcio-fósforo elevado, se aconseja realizar intervención sobre la dieta, aumento de las dosis de sales de calcio y reducción de la dosis de calcitriol.

Con el objetivo de mantener un nivel de 25-OH-D adecuado, se recomienda la suplementación con 400-800 U diarias de colecalciferol en los pacientes tratados con calcitriol.

En pacientes con hipomagnesemia es aconsejable utilizar medidas que puedan incrementar los niveles de magnesio.

Una vez alcanzados los objetivos terapéuticos, se recomienda reevaluar la clínica y los parámetros bioquímicos con una periodicidad mínima anual

No se recomienda el uso rutinario de rhPTH
